# Supplementary material for: The influence of media narratives on microplastics risk perception
Source: PeerJ. 2023 Nov 2;11:e16338. doi: 10.7717/peerj.16338 (PMC10625762; doi:10.7717/peerj.16338)
Supplement: Supplemental Information 1 [file peerj-11-16338-s001.xlsx]

## Sheet: English_Recoded
1) Have you heard of microplastics (MPs)?	2) Are you concerned about the risks that MPs have on your health?	3) Are you concerned about the risks posed by MPs to the environment?	4) MPs cause cancer. (Which of the following information do you know from the media?)	5) MPs cause respiratory diseases. (Which of the following information do you know from the media?)	6) MPs cause intestinal diseases. (Which of the following information do you know from the media?)	7) Ingestion of MPs can cause alteration of chromosomes, which leads to infertility (Which of the following information do you know from the media?)	8) MPs in the sea threaten fish stocks. (Which of the following information do you know from the media?)	9) Animals die from the ingestion of MPs. (Which of the following information do you know from the media?)	10) Leakage of harmful chemicals from MPs affects the soil. (Which of the following information do you know from the media?)	11) MPs in soil limit the growth of plants. (Which of the following information do you know from the media?)	12) Gender	13) Age
1	1	1	4	4	3	3	5	4	3	2	2	32
1	1	1	3	4	3	2	6	4	4	4	2	38
1	1	1	3	4	2	2	5	5	4	4	2	44
1	1	1	3	4	3	1	3	3	4	3	2	26
1	1	1	7	1	3	1	1	6	5	1	2	45
1	1	1	2	2	2	2	6	6	4	3	2	28
0	1	1	2	2	2	2	6	6	6	6	2	48
0	1	1	4	4	4	4	5	5	5	5	2	23
1	1	1	7	7	7	1	7	7	7	7	2	48
1	1	1	7	7	7	7	7	7	7	7	2	53
1	1	1	7	7	7	7	7	7	7	7	2	60
1	1	1	5	6	7	3	6	7	7	7	2	47
1	1	1	6	6	6	6	6	6	6	6	2	38
1	1	1	7	7	7	7	7	7	7	7	2	45
0	1	1	4	4	4	4	6	6	5	4	1	54
0	1	1	1	1	1	1	6	6	6	2	2	26
1	1	1	6	6	6	4	5	6	4	4	2	45
1	1	1	1	1	1	1	4	4	7	5	2	56
0	1	1	6	6	5	5	5	5	5	5	2	29
1	1	1	7	7	7	7	7	7	7	7	1	67
1	1	1	3	3	3	3	7	7	7	7	2	47
1	1	1	5	5	4	4	6	4	6	4	2	43
1	1	1	7	7	6	5	7	7	6	5	2	69
1	1	1	4	4	4	2	5	6	5	5	1	42
1	1	1	5	5	4	4	3	3	2	6	1	26
1	1	1	2	2	2	2	2	1	2	1	2	36
1	1	1	5	6	6	2	6	7	6	3	2	28
1	1	1	7	7	7	4	7	7	7	4	2	65
1	1	1	6	6	6	1	7	7	7	7	2	52
1	1	1	7	7	7	4	7	7	7	7	2	27
1	1	1	5	7	7	1	7	4	7	7	2	22
0	1	1	3	6	6	6	6	6	6	6	2	23
0	1	1	5	5	5	1	4	5	5	4	1	54
1	1	1	5	5	5	5	7	7	7	7	2	37
0	1	1	4	4	5	5	5	7	7	7	2	44
1	1	1	7	1	1	1	6	6	7	6	1	48
1	1	1	2	3	2	1	5	6	4	4	1	30
1	0	1	6	6	6	1	7	7	6	6	2	51
0	1	1	4	5	5	5	5	4	3	4	1	28
1	1	0	4	5	6	2	6	6	6	6	1	50
1	1	1	3	2	1	1	5	1	7	7	1	32
1	1	1	2	3	1	1	5	6	5	4	2	42
1	1	1	2	1	1	1	3	4	5	4	2	32
1	1	1	5	5	5	5	5	5	5	5	1	61
1	1	1	5	5	5	5	5	5	5	5	2	54
0	1	1	4	5	5	2	6	6	6	5	1	50
1	1	1	1	1	1	1	7	7	7	5	1	38
0	1	1	6	7	5	4	7	7	7	7	2	24
1	1	1	5	3	4	3	5	5	3	4	1	21
0	1	1	3	5	4	1	4	4	3	2	1	35
1	1	1	5	1	5	1	7	7	7	7	2	36
0	1	1	5	5	5	5	5	5	5	5	2	49
1	1	1	6	6	6	5	6	6	6	5	1	42
1	1	1	5	4	4	5	6	6	6	4	2	32
1	1	1	3	1	1	1	5	5	2	1	2	34
1	1	1	2	2	2	2	2	2	3	2	2	35
1	1	1	3	3	3	2	5	6	5	4	2	41
1	1	1	2	2	2	2	2	2	2	2	2	40
0	1	1	5	5	5	6	6	6	3	6	2	31
1	1	1	4	4	4	4	4	4	4	4	2	48
1	1	1	7	7	5	5	4	6	6	7	1	47
0	1	1	6	6	6	2	6	6	6	3	2	41
1	1	1	7	7	7	7	7	7	7	7	2	27
1	1	1	5	4	4	4	4	4	4	4	1	24
0	1	1	2	5	6	1	3	7	7	5	1	27
1	1	1	5	6	6	4	7	7	7	7	2	40
0	1	1	7	7	7	7	7	7	7	7	2	36
1	1	1	5	6	6	3	7	7	7	3	2	42
1	1	1	6	6	6	6	6	6	6	6	2	27
1	1	1	4	5	3	1	2	4	4	3	2	33
1	1	0	3	3	3	3	6	6	5	5	1	45
1	1	1	7	7	7	7	7	7	7	7	2	66
1	1	1	7	5	7	5	7	7	7	6	2	65
0	1	1	7	7	7	7	7	7	7	7	2	62
1	1	1	7	7	7	7	7	7	7	7	2	57
1	1	1	7	6	6	1	7	7	7	7	2	70
1	1	1	7	7	7	7	7	7	7	7	2	64
1	1	1	3	3	3	3	3	5	5	4	2	68
1	1	1	7	7	7	5	6	6	5	6	2	69
1	1	1	4	4	4	4	6	6	6	6	1	44
1	1	1	2	3	1	1	3	6	3	5	1	50
1	1	1	5	5	6	6	5	6	5	6	1	28
1	1	1	5	5	6	5	6	4	5	5	2	55
1	1	1	3	4	3	2	6	6	6	6	2	37
1	1	1	5	5	2	1	2	2	7	5	1	50
1	1	1	6	6	6	6	7	7	7	7	2	50
0	1	1	4	3	3	3	4	4	4	4	2	40
1	0	1	4	5	2	1	7	6	6	6	2	27
1	0	0	1	1	1	1	6	6	1	7	2	29
0	1	1	1	1	1	1	2	2	5	4	2	33
1	1	1	7	7	7	7	7	7	7	7	2	50
0	1	1	5	4	4	3	5	6	6	5	2	47
1	1	1	1	1	1	1	3	1	4	1	2	50
0	1	1	3	4	4	2	5	5	3	3	1	55
1	1	1	2	2	2	1	4	1	4	1	1	35
1	1	1	6	7	4	1	1	7	7	7	2	35
0	1	1	3	5	4	4	4	5	6	5	1	20
1	1	1	5	3	5	3	2	7	7	7	2	23
0	1	1	4	4	4	4	4	4	4	4	2	43
1	1	1	2	5	6	1	5	5	4	3	1	40
1	1	1	5	5	5	3	6	7	7	7	2	22
1	1	1	6	6	6	6	6	6	6	6	2	35
0	1	1	6	6	6	4	2	4	6	4	2	40
0	1	0	4	1	1	4	3	5	6	6	2	57
1	1	1	3	3	3	2	5	6	6	6	2	58
1	1	1	6	5	5	7	7	7	7	7	1	58
0	1	1	7	7	7	1	7	7	7	7	2	54
1	1	1	5	5	1	1	7	7	4	6	2	41
1	1	1	4	4	1	4	5	5	5	5	2	36
1	1	1	3	3	3	7	1	1	1	1	2	18
0	1	1	7	7	7	7	7	7	7	7	1	69
1	0	1	3	3	3	3	4	3	3	3	2	18
0	1	1	1	2	1	1	5	4	2	1	2	19
0	1	1	7	7	6	4	7	7	5	6	2	18
1	1	1	7	7	7	7	7	7	7	7	1	16
0	0	0	7	7	7	7	7	7	7	7	1	16
1	0	0	1	1	1	1	1	1	1	1	1	91
1	1	1	6	4	4	4	3	4	3	4	1	17
0	1	1	1	1	1	1	1	1	1	1	2	16
1	1	0	5	4	5	4	5	5	4	4	1	16
0	1	1	7	6	6	5	7	7	6	4	2	16
0	1	1	5	5	5	5	5	6	5	5	2	16
0	1	1	3	4	3	3	3	5	4	5	2	16
0	0	1	4	3	4	1	1	5	3	5	1	16
0	1	1	4	4	4	4	5	4	4	4	1	16
0	1	1	5	5	5	5	5	5	5	5	2	27
1	1	1	5	4	4	2	6	6	6	6	2	43
1	1	1	5	5	3	6	6	5	5	5	1	23
1	1	1	5	6	5	3	7	5	7	7	2	20
1	1	1	5	6	6	5	7	7	6	6	2	24
0	1	1	1	1	1	1	5	5	6	6	2	20
1	1	1	4	5	6	1	6	5	6	6	2	21
1	1	1	1	2	4	1	5	5	6	5	2	20
1	1	1	7	7	7	4	7	7	7	7	2	23
1	1	1	1	1	1	1	1	1	1	1	1	20
1	1	1	7	7	7	7	7	7	7	7	1	49
1	1	1	7	7	7	7	7	7	7	7	2	50
1	1	1	7	7	7	7	7	7	7	7	1	31
1	1	1	4	7	5	5	7	6	6	7	2	24
1	1	1	7	7	6	5	6	7	7	7	2	32
1	1	1	7	7	1	7	7	7	7	7	2	28
1	1	1	5	6	5	1	7	6	6	5	2	53
1	1	1	2	2	2	2	5	5	2	2	1	32
0	1	1	4	5	5	2	3	4	5	4	1	16
0	1	1	4	5	1	6	3	5	3	5	2	17
0	1	1	4	4	4	4	4	4	4	4	1	18
0	1	1	4	6	4	6	4	3	4	6	2	15
0	1	1	1	1	1	1	1	1	1	1	2	17
0	1	1	4	5	6	7	6	5	5	5	1	17
0	1	1	7	7	4	2	3	5	5	4	1	16
0	1	1	4	4	2	7	2	5	5	5	1	17
1	1	1	7	7	7	7	7	7	7	7	2	17
1	1	1	1	7	1	7	1	7	1	7	1	17
1	1	1	6	5	4	4	7	7	7	6	2	60
0	1	1	7	7	7	7	7	7	7	7	1	18
0	0	1	1	1	1	1	1	1	1	1	2	16
0	0	1	1	1	1	1	1	1	1	1	2	17
0	0	0	1	1	1	1	1	1	1	1	2	16
0	1	1	7	7	7	7	7	6	1	1	2	15
1	1	1	7	6	1	1	4	5	4	5	2	17
0	1	1	7	1	1	1	1	1	1	1	2	17
0	1	0	1	1	1	1	1	1	1	1	1	17
1	1	1	3	4	5	3	5	3	2	4	2	19
1	1	1	4	5	5	5	5	5	6	6	2	16
1	1	1	7	1	7	7	5	7	5	5	2	17
0	1	1	4	4	6	5	5	4	4	5	1	18
1	1	1	6	6	6	6	6	7	6	6	2	40
0	0	0	1	1	1	1	1	1	1	1	1	15
0	1	1	4	4	4	4	4	4	4	4	2	16
0	0	0	1	1	7	1	1	1	1	1	1	16
0	0	1	2	4	4	4	4	5	5	2	1	17
0	0	0	4	4	4	3	2	2	2	2	1	16
0	0	0	1	1	1	1	1	1	1	1	1	16
0	1	0	3	2	3	2	2	4	3	4	2	15
0	0	1	4	2	4	2	1	1	1	1	2	15
0	1	1	3	3	4	5	6	5	7	1	1	15
0	0	0	1	1	1	1	1	1	1	1	1	16
0	0	1	2	1	4	7	2	5	5	3	1	16
0	1	0	7	1	1	1	1	1	1	1	1	16
0	1	1	4	4	3	2	6	6	5	5	2	16
0	1	1	1	1	1	1	1	7	6	1	2	15
1	1	1	4	4	2	2	6	6	4	3	1	15
1	1	0	1	1	1	1	1	1	1	1	1	15
0	1	1	1	1	1	1	1	1	1	1	1	16
0	1	1	6	4	3	2	6	2	4	6	2	16
0	1	1	6	6	5	6	6	6	3	5	2	15
0	0	0	1	1	1	1	1	1	1	1	1	15
0	0	1	5	4	5	2	5	4	5	4	1	15
1	1	1	7	1	7	7	7	1	7	7	2	16
0	1	1	1	1	1	1	1	1	1	1	1	16
1	1	1	2	3	1	1	4	6	6	6	1	81
0	1	1	5	5	5	5	5	5	5	5	1	47
1	1	1	6	6	6	6	6	6	6	6	2	43
1	1	1	7	6	3	1	7	7	6	6	2	76
1	1	1	2	5	1	1	5	6	5	5	2	31
1	1	1	5	5	2	1	5	5	6	6	1	41
1	1	1	5	5	5	3	7	7	5	5	1	21
0	0	0	1	1	1	1	1	1	1	1	1	31
1	1	1	5	5	6	6	7	7	4	4	2	47
0	1	1	7	5	5	5	7	7	5	3	2	57
0	1	0	1	1	1	1	4	4	3	3	2	46
1	1	1	6	5	7	1	7	6	7	7	2	34
0	1	1	1	3	1	2	1	1	1	1	2	19
1	1	1	6	6	5	5	6	3	7	5	2	54
1	1	1	6	6	6	6	7	7	6	5	1	55
0	1	1	7	7	4	5	7	7	7	5	1	42
1	1	1	7	5	5	6	6	6	6	6	1	55
0	1	1	2	2	2	2	5	5	3	4	2	44
0	1	1	7	3	1	1	4	1	4	4	1	59
0	1	1	5	6	1	5	5	7	6	6	2	39
1	1	1	6	7	4	6	6	7	7	7	2	51
1	1	1	7	7	7	7	7	7	5	5	2	63
1	1	1	7	7	7	7	1	7	7	7	2	60
1	1	1	5	6	6	2	6	6	6	6	2	53
1	1	1	7	6	7	6	7	7	5	5	2	37
0	1	1	4	6	5	5	6	5	6	5	2	49
1	1	1	2	2	2	5	6	6	5	6	2	23
1	1	1	7	7	6	6	5	5	5	1	2	39
1	1	1	6	6	4	6	6	6	6	6	2	36
1	1	1	6	6	6	7	7	7	7	7	1	70
1	1	1	7	7	7	7	7	7	7	7	2	63
1	1	1	4	4	6	3	7	7	7	7	2	56
1	1	1	6	6	5	5	6	6	6	6	2	48
1	1	1	4	4	3	3	5	5	5	5	1	42
1	1	1	7	7	7	3	7	7	7	7	2	27
1	1	1	6	6	6	5	5	4	7	6	2	36
1	1	1	5	5	3	1	4	6	6	4	2	35
0	1	1	1	1	1	1	1	1	1	1	1	35
1	1	1	3	2	2	1	4	4	4	2	1	65
0	1	1	6	6	6	6	6	6	6	6	2	43
0	1	1	1	1	1	1	1	7	7	7	1	45
1	1	1	7	7	7	7	7	7	7	7	2	52
0	1	1	1	1	1	1	1	1	1	1	1	47
0	1	1	7	1	1	1	5	2	1	1	2	68
0	1	1	2	4	1	1	1	1	1	1	2	31
1	1	1	2	3	3	3	5	5	6	3	2	50
0	1	1	4	3	3	3	6	5	6	6	2	40
0	1	1	6	6	6	6	6	6	6	6	2	51
1	1	1	5	6	6	7	7	7	7	7	2	44
1	1	1	5	5	4	1	6	6	6	6	2	45
0	1	1	5	3	4	1	5	6	5	6	2	37
1	1	1	4	4	4	4	6	6	6	6	2	52
1	1	1	7	7	7	7	7	7	7	7	1	70
0	1	1	6	6	6	6	6	6	6	6	1	53
1	1	1	6	6	6	6	6	6	6	7	2	52
0	1	1	1	3	3	1	4	4	6	5	2	27
0	1	1	7	7	7	7	6	6	6	6	1	42
1	1	1	4	5	3	1	6	5	1	1	2	27
1	1	1	4	6	6	4	7	7	6	6	2	27
1	1	1	5	7	7	7	7	7	7	7	2	26
1	1	1	1	1	1	1	5	6	6	1	2	35
1	1	1	3	3	4	3	5	4	6	3	1	25
1	1	1	2	6	6	1	6	6	5	3	2	24
1	1	1	6	6	7	4	7	5	7	6	1	39
0	1	1	2	2	2	2	2	2	2	2	2	27
0	1	1	4	4	4	4	2	3	7	6	2	49
1	1	1	4	4	4	2	7	7	2	1	1	30
1	1	1	4	3	3	3	3	4	4	4	2	25
1	1	1	7	7	7	7	7	7	7	7	2	57
1	1	1	5	1	5	1	6	7	6	5	2	35
1	1	1	6	6	6	1	6	6	6	6	2	47
1	1	1	3	3	3	1	6	6	6	4	2	47
1	1	1	4	6	3	1	3	3	4	3	2	55
0	1	0	3	3	4	4	4	3	4	4	2	23
0	1	1	6	7	7	6	7	6	6	6	2	22
0	1	1	5	7	7	7	7	7	7	7	2	22
0	1	1	2	2	2	2	2	2	2	2	2	23
0	0	0	3	4	4	4	5	5	4	4	2	22
0	1	1	6	5	5	5	6	7	6	6	1	23
0	1	1	1	1	1	1	1	1	1	1	2	23
1	1	1	7	4	5	4	6	4	6	6	1	23
0	1	1	1	1	1	1	1	4	3	3	2	22
1	0	1	3	7	7	3	7	7	7	7	2	23
0	1	1	6	6	5	3	6	6	6	6	1	22
1	1	1	6	5	5	1	1	6	6	6	2	23
1	1	1	7	7	7	7	7	7	7	7	2	35
0	0	0	1	1	1	1	1	4	4	2	2	23
0	1	1	4	3	3	3	5	5	4	4	2	23
0	1	1	1	1	1	1	3	3	1	1	2	22
1	1	1	4	5	5	5	5	6	6	5	2	32
1	1	1	3	5	3	1	4	3	3	4	1	50
1	1	1	4	4	3	1	7	7	7	6	1	44
1	1	1	7	7	7	4	7	7	7	5	1	43
1	1	1	6	6	5	4	6	6	5	4	1	42
1	1	1	7	7	7	1	7	7	7	7	2	50
1	1	1	5	5	4	2	6	5	5	4	1	35
1	1	1	2	5	5	1	7	7	6	6	1	21
1	1	1	1	1	4	1	5	2	5	1	2	21
1	1	1	3	3	3	3	6	6	3	3	1	38
1	1	1	5	4	3	2	6	5	4	6	2	50
1	1	1	4	4	4	3	6	3	3	3	2	61
1	1	1	7	7	7	1	7	7	2	1	1	44
1	1	1	6	7	5	4	4	6	5	4	2	54
0	1	1	4	4	2	3	5	5	6	6	2	60
1	1	1	6	6	6	6	6	6	5	5	2	50
0	1	1	1	7	1	1	7	7	1	1	2	43
1	1	1	4	6	6	5	6	7	3	3	2	41
0	1	1	5	5	4	2	5	7	5	5	2	27
1	1	1	2	2	4	1	5	5	5	5	2	24
1	1	1	5	5	5	4	6	6	6	5	1	54
0	1	1	7	5	6	5	6	7	7	6	2	39
0	1	1	7	7	7	7	7	7	7	7	2	49
1	1	1	7	7	7	7	7	7	7	7	2	47
1	1	1	7	7	7	7	7	7	7	7	2	22
1	1	1	5	5	5	4	7	6	5	5	2	52
0	1	1	2	2	2	2	5	6	6	6	2	31
1	1	1	1	5	5	1	6	7	7	5	2	25
0	1	1	5	5	5	1	6	7	7	1	2	40
1	1	1	6	3	3	3	7	7	7	7	2	33
1	1	1	7	7	7	6	6	6	6	6	2	46
1	1	1	5	5	6	7	5	6	6	7	1	18
0	1	1	5	5	5	5	1	3	5	3	2	27
1	1	1	6	1	1	1	6	5	6	1	2	54
1	1	1	6	6	6	6	6	6	6	6	2	52
1	1	1	7	1	7	1	7	7	3	1	2	37
1	1	1	1	1	1	1	1	1	1	1	2	46
0	1	1	5	5	5	2	2	6	6	6	1	44
0	1	1	3	3	3	1	4	4	3	1	2	56
0	1	1	2	2	2	2	6	6	6	6	2	39
1	1	1	4	4	4	3	6	6	6	7	1	74
1	1	1	3	4	3	2	7	5	5	5	1	79
0	1	1	2	2	2	2	2	6	7	5	2	48
1	1	1	7	7	7	6	7	7	7	7	2	64
1	1	1	6	5	5	5	5	5	5	5	2	48
1	1	1	4	5	5	3	6	6	5	5	2	25
1	1	1	4	4	4	6	7	7	7	7	1	32
1	1	1	5	5	6	6	7	7	7	7	2	69
1	1	1	7	7	7	7	7	7	7	7	2	30
1	1	1	7	7	7	7	7	7	7	7	2	43
0	1	1	1	1	1	1	6	7	7	7	2	33
0	1	1	5	5	5	1	7	7	6	6	2	38
0	1	1	5	5	5	4	5	5	5	5	2	54
1	1	1	5	5	3	2	7	7	6	7	1	81
0	1	1	1	1	1	1	6	7	7	6	2	55
1	1	1	5	1	7	4	7	4	6	4	1	50
1	1	1	4	2	4	1	6	5	5	6	2	57
1	1	1	7	7	7	7	7	7	7	7	2	50
1	1	1	7	7	7	7	7	7	7	1	2	54
1	1	1	5	5	5	3	6	6	6	5	2	27
0	1	0	2	4	4	4	6	6	3	3	2	24
1	1	1	3	4	2	1	4	5	6	6	1	82
1	1	1	7	7	7	7	7	7	7	7	1	43
1	1	1	6	6	6	2	2	6	6	6	2	47
0	1	1	5	4	4	4	5	6	6	6	2	39
1	1	1	7	1	7	1	7	7	7	7	2	43
1	1	1	5	5	5	5	6	5	5	4	2	19
0	1	1	2	4	4	2	2	2	4	4	2	27
0	1	1	1	1	1	1	1	1	1	1	2	54
1	1	1	7	7	7	7	7	7	7	7	2	50
0	0	1	7	5	6	2	7	7	6	5	1	57
1	1	1	5	3	2	1	5	5	4	1	2	50
1	1	1	4	4	4	4	4	4	4	4	1	81
1	0	0	2	2	1	1	6	7	6	6	2	84
1	1	0	3	5	1	1	4	5	5	6	2	79
1	0	0	4	4	1	1	5	5	6	6	2	77
1	0	0	4	4	2	1	6	6	6	6	2	67
1	0	0	1	1	1	1	1	1	1	1	1	56
0	1	1	4	4	4	4	4	4	4	4	1	46
1	1	1	6	6	5	7	6	7	4	5	1	18
0	1	1	4	4	4	4	4	4	4	4	2	27
0	1	1	6	5	5	1	7	7	5	5	2	27
1	1	1	7	7	7	7	7	7	7	7	2	33
1	1	1	5	5	7	6	7	7	7	7	2	47
1	1	1	6	1	2	1	6	6	5	1	2	41
1	1	1	5	5	5	5	5	5	5	5	2	55
0	1	1	7	7	7	7	7	7	7	7	1	28
1	1	1	1	5	4	1	7	7	3	6	2	22
0	1	1	2	2	2	2	7	7	7	7	2	39
1	1	1	2	2	2	2	3	3	3	3	2	63
0	1	1	2	3	2	3	2	3	3	2	1	20
1	1	1	6	6	6	6	6	6	6	6	2	21
1	1	1	5	5	5	2	4	7	7	5	1	21
0	1	1	5	3	4	3	7	7	5	5	2	21
1	1	1	4	2	2	1	4	4	3	6	1	39
0	1	1	4	1	1	1	3	7	7	1	2	38
1	1	1	7	4	5	6	7	7	7	7	2	20
1	1	1	7	5	5	1	7	7	7	7	2	34
0	1	1	1	1	1	1	1	1	1	1	2	35
0	1	1	4	5	5	2	6	6	6	6	2	31
1	1	1	6	5	5	1	4	6	6	6	2	43
1	1	1	1	3	4	1	5	7	7	4	1	21
0	1	1	5	4	4	4	7	7	7	4	2	30
1	1	1	5	5	5	2	6	6	5	4	1	27
0	1	1	5	1	1	1	5	6	6	6	1	25
1	1	1	4	4	4	5	5	5	6	5	2	53
1	1	1	4	4	3	2	5	5	5	3	1	54
1	1	1	1	2	1	1	6	3	6	5	1	27
1	1	1	4	5	1	1	4	1	3	1	2	27
1	1	1	6	6	6	5	7	6	6	6	2	53
1	0	1	4	3	2	2	3	4	4	5	1	65
1	1	1	2	4	1	1	4	5	5	5	1	78
1	1	1	3	3	5	3	6	5	3	3	1	36
1	0	1	2	3	1	1	3	5	3	4	1	72
1	0	1	2	2	1	1	4	4	4	5	2	65
1	1	1	2	3	1	1	3	5	4	5	2	53
0	1	1	6	5	5	5	4	6	6	6	1	41
1	1	1	7	7	7	7	7	7	7	7	2	48
1	1	1	5	5	4	1	5	5	7	6	2	64
1	1	1	6	7	5	6	7	6	7	7	2	52
1	1	1	6	6	5	5	7	7	7	7	2	32
0	1	1	6	6	6	5	7	7	7	6	2	32
1	1	1	2	2	2	2	6	6	4	2	1	40
1	1	1	5	5	3	2	6	2	4	3	2	48
1	1	0	5	5	5	5	5	6	5	5	2	41
0	1	1	2	2	2	2	2	2	2	2	2	45
1	1	1	5	5	2	1	5	5	5	5	2	66
1	1	1	6	7	7	3	7	7	7	7	2	27
1	1	1	6	6	5	1	6	6	6	5	2	44
1	0	0	2	2	1	1	4	5	2	2	2	72
1	0	0	2	2	1	1	6	6	4	4	1	49
1	0	0	1	2	1	1	3	3	2	3	1	42
0	1	1	4	4	4	4	5	5	6	4	2	38
1	1	1	2	3	1	2	4	5	3	4	1	66
1	1	1	7	7	7	7	7	7	7	7	1	49
0	1	1	7	6	5	6	5	5	4	5	1	20
1	0	1	3	2	2	2	3	6	5	4	2	54
1	1	1	6	6	5	5	6	5	6	5	1	45
